# Supplementary material
Source: Springer Nature journal article supplement (https://www.springermedizin.de/resource/supplementary/12933_2010_334_MOESM2_ESM.pdf/9538176)
Supplement: MOESM2 [file 9538176]

←
**Exenatide Better**
**Comparator Better**
→

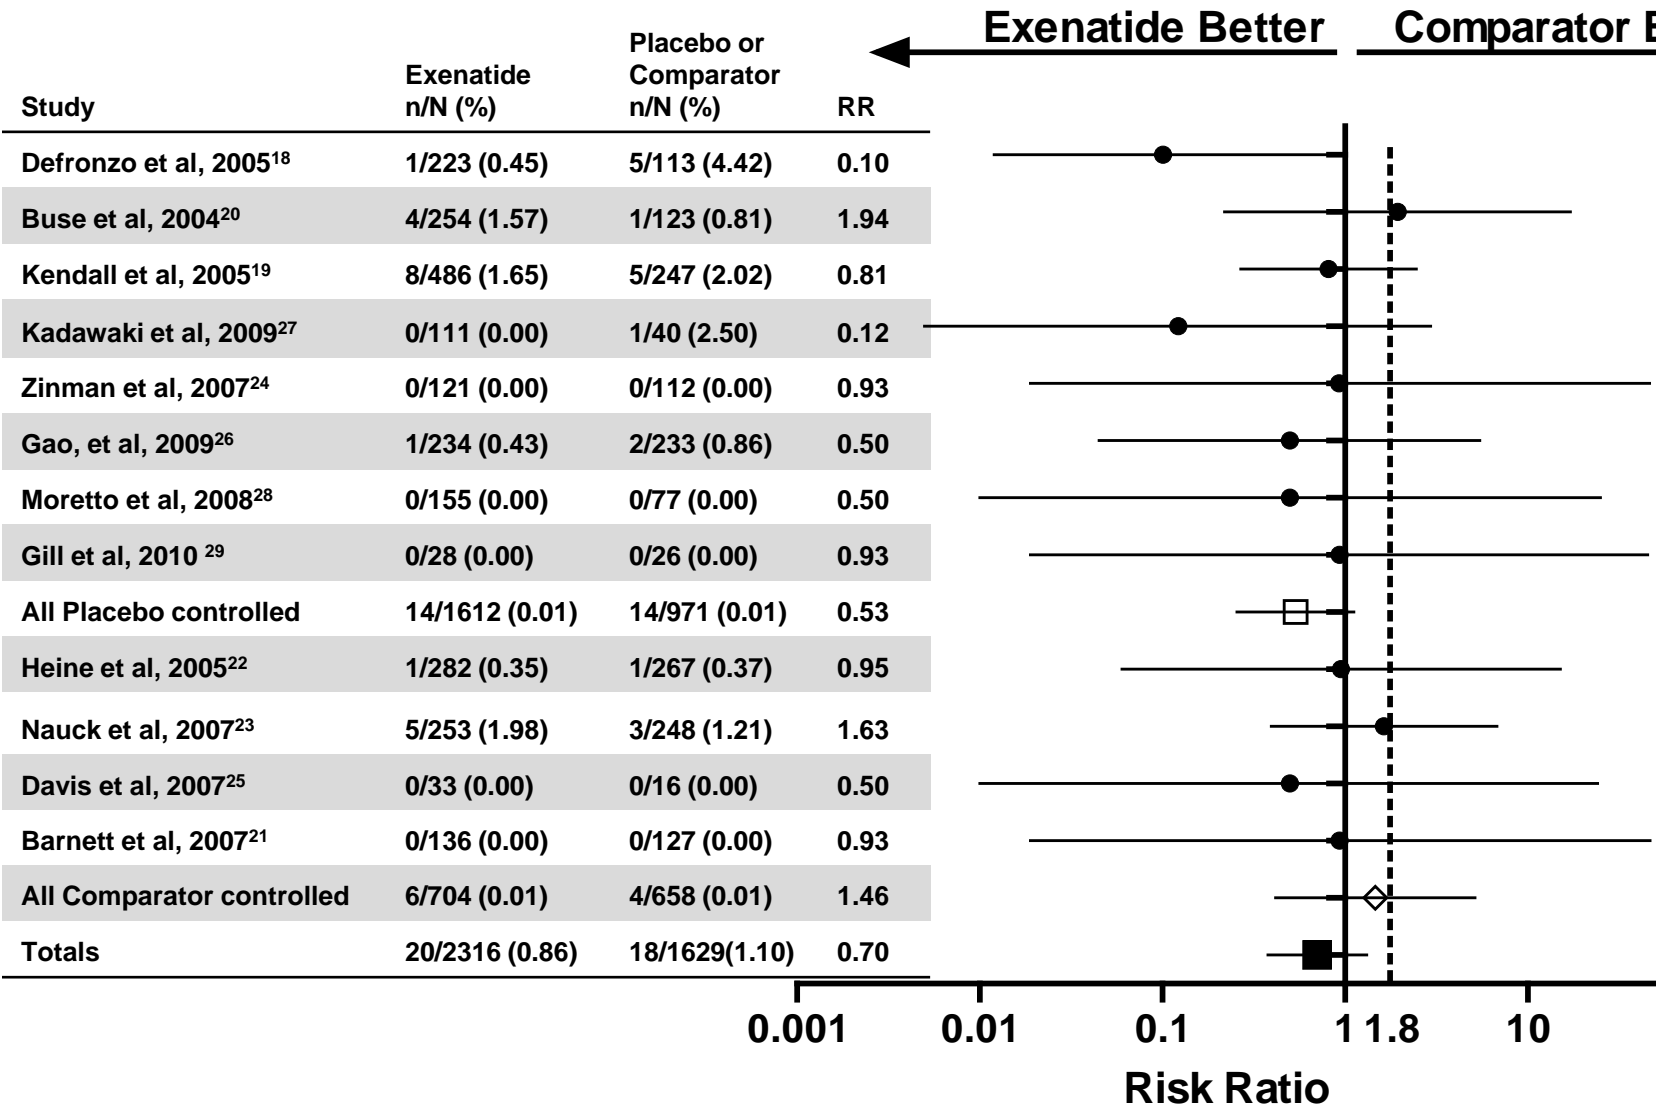

• RR exenatide BID vs placebo or comparator by individual study; □ RR exenatide BID vs All placebo studies;  
 ◇ RR exenatide vs All comparator studies; ■ RR exenatide BID vs All placebo or comparator studies
